# Supplementary material for: Knotting a molecular strand can invert macroscopic effects of chirality
Source: Springer Nature journal article supplement (doi:10.1038/s41557-020-0517-1), 2020-08-03
Supplement: 41557_2020_517_MOESM5_ESM.mol [file 41557_2020_517_MOESM5_ESM.mol]

nchem.19102092B-comp2.mol
  ChemDraw06292018152D

158174  0  0  1  0  0  0  0  0999 V2000
  -11.0390    1.6426    0.0000 C   0  0  0  0  0  0  0  0  0  0  0  0
  -11.0390    0.8176    0.0000 C   0  0  0  0  0  0  0  0  0  0  0  0
  -10.3240    0.4051    0.0000 C   0  0  0  0  0  0  0  0  0  0  0  0
   -9.6096    0.8176    0.0000 C   0  0  0  0  0  0  0  0  0  0  0  0
   -9.6096    1.6426    0.0000 C   0  0  0  0  0  0  0  0  0  0  0  0
  -10.3240    2.0551    0.0000 C   0  0  0  0  0  0  0  0  0  0  0  0
  -10.3240   -0.4199    0.0000 C   0  0  0  0  0  0  0  0  0  0  0  0
   -9.6096   -0.8324    0.0000 C   0  0  0  0  0  0  0  0  0  0  0  0
   -8.8952   -0.4199    0.0000 C   0  0  0  0  0  0  0  0  0  0  0  0
   -8.8952    0.4051    0.0000 C   0  0  0  0  0  0  0  0  0  0  0  0
  -10.3240    2.8801    0.0000 C   0  0  0  0  0  0  0  0  0  0  0  0
  -11.0390    3.2926    0.0000 C   0  0  0  0  0  0  0  0  0  0  0  0
   -9.6096    3.2926    0.0000 N   0  0  0  0  0  0  0  0  0  0  0  0
   -9.6096    4.1176    0.0000 C   0  0  0  0  0  0  0  0  0  0  0  0
   -8.8952    4.5301    0.0000 C   0  0  0  0  0  0  0  0  0  0  0  0
  -10.3240    4.5301    0.0000 O   0  0  0  0  0  0  0  0  0  0  0  0
   -8.1807    4.1176    0.0000 N   0  0  0  0  0  0  0  0  0  0  0  0
   -7.4663    4.5301    0.0000 C   0  0  0  0  0  0  0  0  0  0  0  0
   -7.4663    5.3551    0.0000 C   0  0  0  0  0  0  0  0  0  0  0  0
   -8.1807    5.7676    0.0000 C   0  0  0  0  0  0  0  0  0  0  0  0
   -8.8952    5.3551    0.0000 C   0  0  0  0  0  0  0  0  0  0  0  0
   -6.7519    4.1176    0.0000 C   0  0  0  0  0  0  0  0  0  0  0  0
   -6.0374    4.5301    0.0000 O   0  0  0  0  0  0  0  0  0  0  0  0
   -6.7519    3.2926    0.0000 N   0  0  0  0  0  0  0  0  0  0  0  0
   -6.0374    2.8801    0.0000 C   0  0  0  0  0  0  0  0  0  0  0  0
   -6.0374    2.0551    0.0000 C   0  0  0  0  0  0  0  0  0  0  0  0
   -6.7519    1.6426    0.0000 C   0  0  0  0  0  0  0  0  0  0  0  0
   -6.7519    0.8176    0.0000 C   0  0  0  0  0  0  0  0  0  0  0  0
   -6.0374    0.4051    0.0000 C   0  0  0  0  0  0  0  0  0  0  0  0
   -5.3230    0.8176    0.0000 C   0  0  0  0  0  0  0  0  0  0  0  0
   -5.3230    1.6426    0.0000 C   0  0  0  0  0  0  0  0  0  0  0  0
   -7.4663    0.4051    0.0000 C   0  0  0  0  0  0  0  0  0  0  0  0
   -7.4663   -0.4199    0.0000 C   0  0  0  0  0  0  0  0  0  0  0  0
   -6.7519   -0.8324    0.0000 C   0  0  0  0  0  0  0  0  0  0  0  0
   -6.0374   -0.4199    0.0000 C   0  0  0  0  0  0  0  0  0  0  0  0
   -6.7519   -1.6574    0.0000 O   0  0  0  0  0  0  0  0  0  0  0  0
   -5.3230    3.2926    0.0000 C   0  0  0  0  0  0  0  0  0  0  0  0
   -6.1686   -2.2407    0.0000 C   0  0  0  0  0  0  0  0  0  0  0  0
   -5.3436   -2.2407    0.0000 C   0  0  0  0  0  0  0  0  0  0  0  0
   -4.9311   -1.5263    0.0000 C   0  0  0  0  0  0  0  0  0  0  0  0
   -4.5186   -2.2407    0.0000 C   0  0  0  0  0  0  0  0  0  0  0  0
   -3.6936   -2.2407    0.0000 C   0  0  0  0  0  0  0  0  0  0  0  0
   -3.2811   -1.5263    0.0000 C   0  0  0  0  0  0  0  0  0  0  0  0
   -2.8686   -2.2407    0.0000 C   0  0  0  0  0  0  0  0  0  0  0  0
   -2.0436   -2.2407    0.0000 C   0  0  0  0  0  0  0  0  0  0  0  0
   -2.9741    1.6574    0.0000 C   0  0  0  0  0  0  0  0  0  0  0  0
   -2.9741    0.8324    0.0000 C   0  0  0  0  0  0  0  0  0  0  0  0
   -2.2596    0.4199    0.0000 C   0  0  0  0  0  0  0  0  0  0  0  0
   -1.5452    0.8324    0.0000 C   0  0  0  0  0  0  0  0  0  0  0  0
   -1.5452    1.6574    0.0000 C   0  0  0  0  0  0  0  0  0  0  0  0
   -2.2596    2.0699    0.0000 C   0  0  0  0  0  0  0  0  0  0  0  0
   -2.2596   -0.4051    0.0000 C   0  0  0  0  0  0  0  0  0  0  0  0
   -1.5452   -0.8176    0.0000 C   0  0  0  0  0  0  0  0  0  0  0  0
   -0.8308   -0.4051    0.0000 C   0  0  0  0  0  0  0  0  0  0  0  0
   -0.8308    0.4199    0.0000 C   0  0  0  0  0  0  0  0  0  0  0  0
   -1.5452   -1.6426    0.0000 O   0  0  0  0  0  0  0  0  0  0  0  0
   -2.2596    2.8949    0.0000 C   0  0  0  0  0  0  0  0  0  0  0  0
   -2.9741    3.3074    0.0000 C   0  0  0  0  0  0  0  0  0  0  0  0
   -1.5452    3.3074    0.0000 N   0  0  0  0  0  0  0  0  0  0  0  0
   -1.5452    4.1324    0.0000 C   0  0  0  0  0  0  0  0  0  0  0  0
   -0.8308    4.5449    0.0000 C   0  0  0  0  0  0  0  0  0  0  0  0
   -2.2596    4.5449    0.0000 O   0  0  0  0  0  0  0  0  0  0  0  0
   -0.1163    4.1324    0.0000 N   0  0  0  0  0  0  0  0  0  0  0  0
    0.5981    4.5449    0.0000 C   0  0  0  0  0  0  0  0  0  0  0  0
    0.5981    5.3699    0.0000 C   0  0  0  0  0  0  0  0  0  0  0  0
   -0.8308    5.3699    0.0000 C   0  0  0  0  0  0  0  0  0  0  0  0
    1.3125    4.1324    0.0000 C   0  0  0  0  0  0  0  0  0  0  0  0
    2.0269    4.5449    0.0000 O   0  0  0  0  0  0  0  0  0  0  0  0
    1.3125    3.3074    0.0000 N   0  0  0  0  0  0  0  0  0  0  0  0
    2.0269    2.8949    0.0000 C   0  0  0  0  0  0  0  0  0  0  0  0
    2.0269    2.0699    0.0000 C   0  0  0  0  0  0  0  0  0  0  0  0
    1.3125    1.6574    0.0000 C   0  0  0  0  0  0  0  0  0  0  0  0
    1.3125    0.8324    0.0000 C   0  0  0  0  0  0  0  0  0  0  0  0
    2.0269    0.4199    0.0000 C   0  0  0  0  0  0  0  0  0  0  0  0
    2.7414    0.8324    0.0000 C   0  0  0  0  0  0  0  0  0  0  0  0
    2.7414    1.6574    0.0000 C   0  0  0  0  0  0  0  0  0  0  0  0
    0.5981    0.4199    0.0000 C   0  0  0  0  0  0  0  0  0  0  0  0
    0.5981   -0.4051    0.0000 C   0  0  0  0  0  0  0  0  0  0  0  0
    1.3125   -0.8176    0.0000 C   0  0  0  0  0  0  0  0  0  0  0  0
    2.0269   -0.4051    0.0000 C   0  0  0  0  0  0  0  0  0  0  0  0
    1.3125   -1.6426    0.0000 O   0  0  0  0  0  0  0  0  0  0  0  0
    2.7414    3.3074    0.0000 C   0  0  0  0  0  0  0  0  0  0  0  0
    3.2816   -1.5263    0.0000 C   0  0  0  0  0  0  0  0  0  0  0  0
    3.6941   -2.2407    0.0000 C   0  0  0  0  0  0  0  0  0  0  0  0
    4.5191   -2.2407    0.0000 C   0  0  0  0  0  0  0  0  0  0  0  0
    4.9316   -1.5263    0.0000 C   0  0  0  0  0  0  0  0  0  0  0  0
    5.3441   -2.2407    0.0000 C   0  0  0  0  0  0  0  0  0  0  0  0
    6.1691   -2.2407    0.0000 C   0  0  0  0  0  0  0  0  0  0  0  0
    5.3235    3.2926    0.0000 C   0  0  0  0  0  0  0  0  0  0  0  0
    6.7524   -1.6574    0.0000 O   0  0  0  0  0  0  0  0  0  0  0  0
    6.0379   -0.4199    0.0000 C   0  0  0  0  0  0  0  0  0  0  0  0
    6.7524   -0.8324    0.0000 C   0  0  0  0  0  0  0  0  0  0  0  0
    7.4668   -0.4199    0.0000 C   0  0  0  0  0  0  0  0  0  0  0  0
    7.4668    0.4051    0.0000 C   0  0  0  0  0  0  0  0  0  0  0  0
    5.3235    1.6426    0.0000 C   0  0  0  0  0  0  0  0  0  0  0  0
    5.3235    0.8176    0.0000 C   0  0  0  0  0  0  0  0  0  0  0  0
    6.0379    0.4051    0.0000 C   0  0  0  0  0  0  0  0  0  0  0  0
    6.7524    0.8176    0.0000 C   0  0  0  0  0  0  0  0  0  0  0  0
    6.7524    1.6426    0.0000 C   0  0  0  0  0  0  0  0  0  0  0  0
    6.0379    2.0551    0.0000 C   0  0  0  0  0  0  0  0  0  0  0  0
    6.0379    2.8801    0.0000 C   0  0  0  0  0  0  0  0  0  0  0  0
    6.7524    3.2926    0.0000 N   0  0  0  0  0  0  0  0  0  0  0  0
    6.0379    4.5301    0.0000 O   0  0  0  0  0  0  0  0  0  0  0  0
    6.7524    4.1176    0.0000 C   0  0  0  0  0  0  0  0  0  0  0  0
    8.8956    5.3551    0.0000 C   0  0  0  0  0  0  0  0  0  0  0  0
    8.1812    5.7676    0.0000 C   0  0  0  0  0  0  0  0  0  0  0  0
    7.4668    5.3551    0.0000 C   0  0  0  0  0  0  0  0  0  0  0  0
    7.4668    4.5301    0.0000 C   0  0  0  0  0  0  0  0  0  0  0  0
    8.1812    4.1176    0.0000 N   0  0  0  0  0  0  0  0  0  0  0  0
   10.3245    4.5301    0.0000 O   0  0  0  0  0  0  0  0  0  0  0  0
    8.8956    4.5301    0.0000 C   0  0  0  0  0  0  0  0  0  0  0  0
    9.6101    4.1176    0.0000 C   0  0  0  0  0  0  0  0  0  0  0  0
    9.6101    3.2926    0.0000 N   0  0  0  0  0  0  0  0  0  0  0  0
   11.0389    3.2926    0.0000 C   0  0  0  0  0  0  0  0  0  0  0  0
   10.3245    2.8801    0.0000 C   0  0  0  0  0  0  0  0  0  0  0  0
    8.8956    0.4051    0.0000 C   0  0  0  0  0  0  0  0  0  0  0  0
    8.8956   -0.4199    0.0000 C   0  0  0  0  0  0  0  0  0  0  0  0
    9.6101   -0.8324    0.0000 C   0  0  0  0  0  0  0  0  0  0  0  0
   10.3245   -0.4199    0.0000 C   0  0  0  0  0  0  0  0  0  0  0  0
   10.3245    2.0551    0.0000 C   0  0  0  0  0  0  0  0  0  0  0  0
    9.6101    1.6426    0.0000 C   0  0  0  0  0  0  0  0  0  0  0  0
    9.6101    0.8176    0.0000 C   0  0  0  0  0  0  0  0  0  0  0  0
   10.3245    0.4051    0.0000 C   0  0  0  0  0  0  0  0  0  0  0  0
   11.0389    0.8176    0.0000 C   0  0  0  0  0  0  0  0  0  0  0  0
   11.0389    1.6426    0.0000 C   0  0  0  0  0  0  0  0  0  0  0  0
    2.8691   -2.2407    0.0000 C   0  0  0  0  0  0  0  0  0  0  0  0
    2.0441   -2.2407    0.0000 C   0  0  0  0  0  0  0  0  0  0  0  0
   -0.1163    5.7824    0.0000 C   0  0  0  0  0  0  0  0  0  0  0  0
    9.6101   -1.6574    0.0000 O   0  0  0  0  0  0  0  0  0  0  0  0
   -9.6096   -1.6574    0.0000 O   0  0  0  0  0  0  0  0  0  0  0  0
  -10.3241   -2.0699    0.0000 C   0  0  0  0  0  0  0  0  0  0  0  0
   10.3245   -2.0699    0.0000 C   0  0  0  0  0  0  0  0  0  0  0  0
  -10.3241   -2.8949    0.0000 C   0  0  0  0  0  0  0  0  0  0  0  0
  -11.0385   -1.6574    0.0000 O   0  0  0  0  0  0  0  0  0  0  0  0
   10.3245   -2.8949    0.0000 C   0  0  0  0  0  0  0  0  0  0  0  0
   11.0390   -1.6574    0.0000 O   0  0  0  0  0  0  0  0  0  0  0  0
  -11.0385   -3.3074    0.0000 C   0  0  0  0  0  0  0  0  0  0  0  0
  -11.0385   -4.1324    0.0000 C   0  0  0  0  0  0  0  0  0  0  0  0
  -10.3241   -4.5449    0.0000 C   0  0  0  0  0  0  0  0  0  0  0  0
   -9.6096   -4.1324    0.0000 C   0  0  0  0  0  0  0  0  0  0  0  0
   -9.6096   -3.3074    0.0000 C   0  0  0  0  0  0  0  0  0  0  0  0
    9.6101   -3.3074    0.0000 C   0  0  0  0  0  0  0  0  0  0  0  0
    9.6101   -4.1324    0.0000 C   0  0  0  0  0  0  0  0  0  0  0  0
   10.3245   -4.5449    0.0000 C   0  0  0  0  0  0  0  0  0  0  0  0
   11.0390   -4.1324    0.0000 C   0  0  0  0  0  0  0  0  0  0  0  0
   11.0390   -3.3074    0.0000 C   0  0  0  0  0  0  0  0  0  0  0  0
  -10.3241   -5.3699    0.0000 C   0  0  0  0  0  0  0  0  0  0  0  0
   -9.6096   -5.7824    0.0000 C   0  0  0  0  0  0  0  0  0  0  0  0
   -8.8951   -5.3699    0.0000 C   0  0  0  0  0  0  0  0  0  0  0  0
   -8.8951   -4.5449    0.0000 C   0  0  0  0  0  0  0  0  0  0  0  0
   -8.1806   -4.1324    0.0000 C   0  0  0  0  0  0  0  0  0  0  0  0
   10.3245   -5.3699    0.0000 C   0  0  0  0  0  0  0  0  0  0  0  0
    9.6101   -5.7824    0.0000 C   0  0  0  0  0  0  0  0  0  0  0  0
    8.8956   -5.3699    0.0000 C   0  0  0  0  0  0  0  0  0  0  0  0
    8.8956   -4.5449    0.0000 C   0  0  0  0  0  0  0  0  0  0  0  0
    8.1811   -4.1324    0.0000 C   0  0  0  0  0  0  0  0  0  0  0  0
   -8.1806   -3.3074    0.0000 C   0  0  0  0  0  0  0  0  0  0  0  0
    8.1811   -3.3074    0.0000 C   0  0  0  0  0  0  0  0  0  0  0  0
  1  2  2  0      
  2  3  1  0      
  3  4  2  0      
  4  5  1  0      
  5  6  2  0      
  6  1  1  0      
  3  7  1  0      
  7  8  2  0      
  8  9  1  0      
  9 10  2  0      
 10  4  1  0      
  8130  1  0      
  6 11  1  0      
 11 12  1  1      
 11 13  1  0      
 13 14  1  0      
 14 15  1  0      
 14 16  2  0      
 15 17  2  0      
 17 18  1  0      
 18 19  2  0      
 19 20  1  0      
 20 21  2  0      
 21 15  1  0      
 18 22  1  0      
 22 23  2  0      
 22 24  1  0      
 24 25  1  0      
 25 26  1  0      
 26 27  2  0      
 27 28  1  0      
 28 29  2  0      
 29 30  1  0      
 30 31  2  0      
 31 26  1  0      
 28 32  1  0      
 32 33  2  0      
 33 34  1  0      
 34 35  2  0      
 35 29  1  0      
 34 36  1  0      
 25 37  1  6      
 36 38  1  0      
 38 39  1  0      
 39 40  1  0      
 40 41  1  0      
 41 42  1  0      
 42 43  1  0      
 43 44  1  0      
 44 45  1  0      
 46 47  2  0      
 47 48  1  0      
 48 49  2  0      
 49 50  1  0      
 50 51  2  0      
 51 46  1  0      
 48 52  1  0      
 52 53  2  0      
 53 54  1  0      
 54 55  2  0      
 55 49  1  0      
 53 56  1  0      
 51 57  1  0      
 57 58  1  1      
 57 59  1  0      
 59 60  1  0      
 60 61  1  0      
 60 62  2  0      
 61 63  1  0      
 63 64  2  0      
 64 65  1  0      
 66 61  2  0      
 64 67  1  0      
 67 68  2  0      
 67 69  1  0      
 69 70  1  0      
 70 71  1  0      
 71 72  2  0      
 72 73  1  0      
 73 74  2  0      
 74 75  1  0      
 75 76  2  0      
 76 71  1  0      
 73 77  1  0      
 77 78  2  0      
 78 79  1  0      
 79 80  2  0      
 80 74  1  0      
 79 81  1  0      
 70 82  1  6      
 45 56  1  0      
 84 83  1  0      
 85 84  1  0      
 86 85  1  0      
 87 86  1  0      
 88 87  1  0      
 90 88  1  0      
101 89  1  1      
 92 90  1  0      
 91 97  1  0      
 92 91  2  0      
 93 92  1  0      
 94 93  2  0      
 98 94  1  0      
 95100  1  0      
 96 95  2  0      
 97 96  1  0      
 98 97  2  0      
 99 98  1  0      
100 99  2  0      
101100  1  0      
102101  1  0      
104102  1  0      
104103  2  0      
108104  1  0      
105111  1  0      
106105  2  0      
107106  1  0      
108107  2  0      
109108  1  0      
111109  2  0      
112110  2  0      
112111  1  0      
113112  1  0      
115113  1  0      
115114  1  6      
120115  1  0      
118129  1  0      
116122  1  0      
117116  2  0      
118117  1  0      
119118  2  0      
123119  1  0      
120125  1  0      
121120  2  0      
122121  1  0      
123122  2  0      
124123  1  0      
125124  2  0      
 83126  1  0      
126127  1  0      
127 81  1  0      
 65128  2  0      
128 66  1  0      
130131  1  0      
129132  1  0      
131133  1  0      
131134  2  0      
132135  1  0      
132136  2  0      
133137  2  0      
137138  1  0      
138139  2  0      
139140  1  0      
140141  2  0      
141133  1  0      
135142  2  0      
142143  1  0      
143144  2  0      
144145  1  0      
145146  2  0      
146135  1  0      
139147  1  0      
147148  1  0      
148149  1  0      
149150  1  0      
150151  1  0      
144152  1  0      
152153  1  0      
153154  1  0      
154155  1  0      
155156  1  0      
151157  1  0      
156158  1  0      
M  END
